# Supplementary material for: Prediction of visual function from automatically quantified optical coherence tomography biomarkers in patients with geographic atrophy using machine learning
Source: PubMed Central journal article supplement (PMC9481631; doi:10.1038/s41598-022-19413-z), 2022-09-16

**A**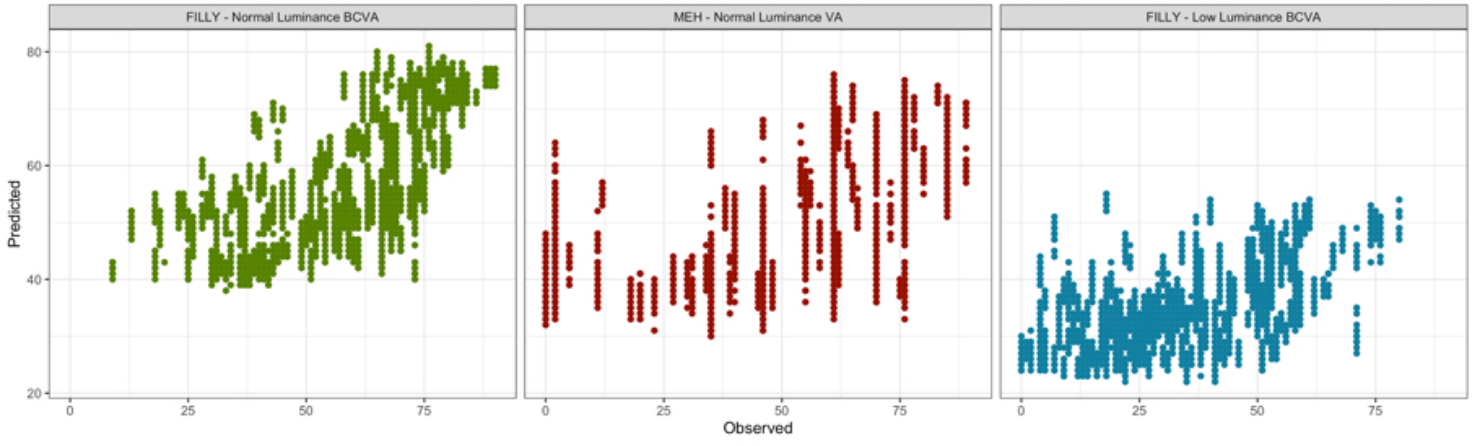**B**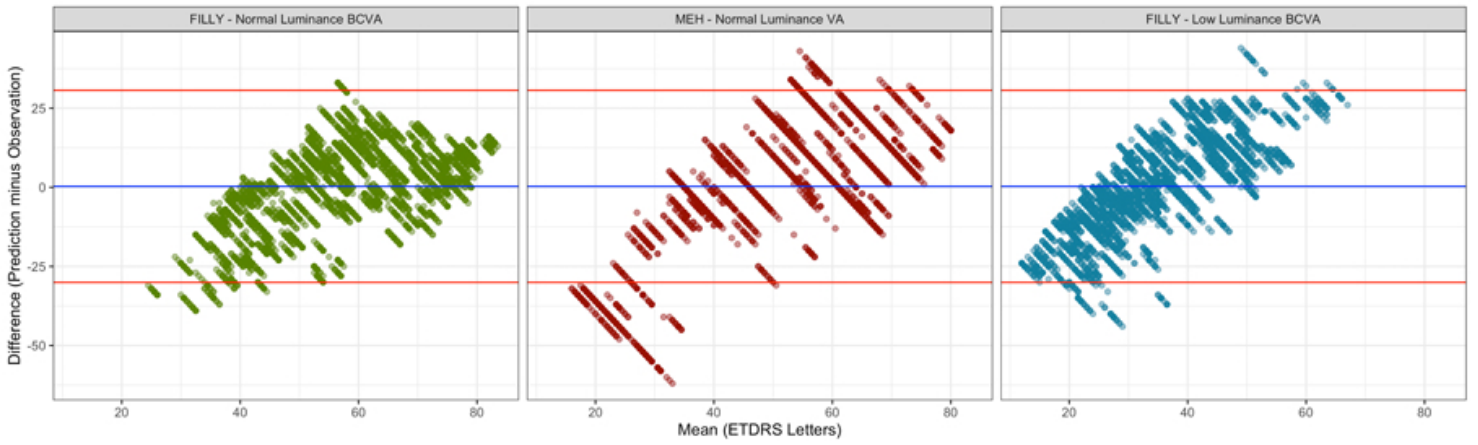

Supplement: 41598_2022_19413_MOESM5_ESM.pdf [file 41598_2022_19413_MOESM5_ESM.pdf]
